# Supplementary material for: Stromal cell identity modulates vascular morphogenesis in a microvasculature-on-a-chip platform
Source: Royal Society of Chemistry journal article supplement (doi:10.1039/d0lc01092h), 2021-01-01
Supplement: d0lc01092h1.pdf [file d0lc01092h1.pdf]

**Stromal Cell Identity Modulates Vascular Morphogenesis in a Microvasculature-on-a-Chip Platform**

Emily A. Margolis<sup>1</sup>, David S. Cleveland<sup>2</sup>, Yen P. Kong<sup>1</sup>, Jeffrey A. Beamish<sup>2</sup>, William Y. Wang, Brendon M. Baker, and Andrew J. Putnam<sup>1\*</sup>

**SUPPLEMENT**

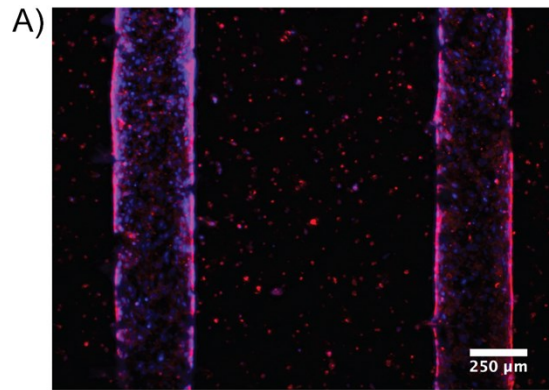

500 K/mL HUVECs

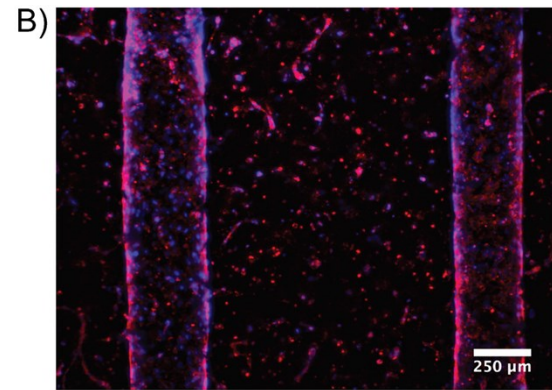

1 M/mL HUVECs

**Figure S1:** ECs in the absence of SCs fail to form vessels. Using two different EC densities (A) 500 K/mL and (B) 1 M/mL, ECs failed to self-assemble into vessels by day 7. Primitive vessel structures formed in the higher density condition but did not remain stable over time.

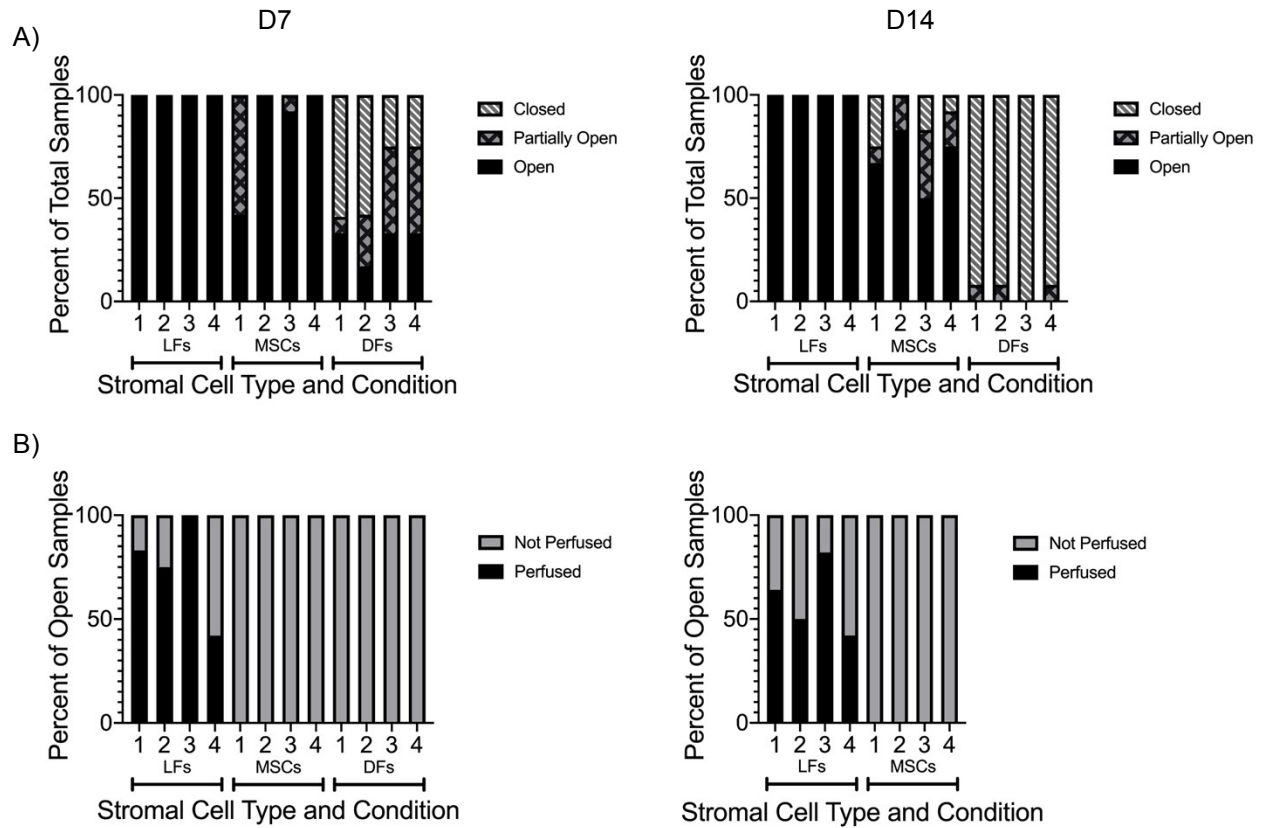

**Figure S2:** Stromal cell type determines vessel patency and microvascular network perfusion. (A) Channel patency and (B) network perfusion for each cell type on day 7 (left) and day 14 (right). A total of  $n = 3-4$  per condition, per time point, per cell type and  $N = 3$  independent replicates included per condition, per time point, per cell type were analyzed.
